# Supplementary material
Source: MDPI journal article supplement (https://www.mdpi.com/2073-4344/13/2/364)
Supplement: s1 [file s1]

Archive with 3 entries (3 files):
- catalysts-2098948-supplementary.pdf
- Table S4.xlsx
- Table S5.xlsx
