# Supplementary material
Source: MDPI journal article supplement (https://www.mdpi.com/2073-4344/13/2/364)
Supplement: s1 [file s1 › Table S4.xlsx]

## Sheet: Sheet1
Name	Distance	Category	Types	From	From Chemistry	To	To Chemistry	Angle XDA	Angle DAY	Angle DHA	Angle HAY
C4-AHL precursor
:UNL1:O - A:TYR103:O	3.01645	Hydrogen Bond	Conventional Hydrogen Bond	:UNL1:O	H-Donor	A:TYR103:O	H-Acceptor	135.215	129.364
A:CYS106:HN - :UNL1:O	2.49794	Hydrogen Bond	Conventional Hydrogen Bond	A:CYS106:HN	H-Donor	:UNL1:O	H-Acceptor			117.934	147.901
A:GLY107:HN - :UNL1:O	2.12205	Hydrogen Bond	Conventional Hydrogen Bond	A:GLY107:HN	H-Donor	:UNL1:O	H-Acceptor			139.337	102.202
A:TYR108:HN - :UNL1:O	2.35365	Hydrogen Bond	Conventional Hydrogen Bond	A:TYR108:HN	H-Donor	:UNL1:O	H-Acceptor			139.13	107.144
A:ALA109:HN - :UNL1:O	2.08433	Hydrogen Bond	Conventional Hydrogen Bond	A:ALA109:HN	H-Donor	:UNL1:O	H-Acceptor			159.831	97.199
:UNL1 - A:LEU99	4.08091	Hydrophobic	Alkyl	:UNL1	Alkyl	A:LEU99	Alkyl
A:ALA109 - :UNL1	3.68317	Hydrophobic	Alkyl	A:ALA109	Alkyl	:UNL1	Alkyl
A:TRP104 - :UNL1	4.83423	Hydrophobic	Pi-Alkyl	A:TRP104	Pi-Orbitals	:UNL1	Alkyl
C6-AHL precursor
:UNL1:O - A:LEU99:O	2.8906	Hydrogen Bond	Conventional Hydrogen Bond	:UNL1:O	H-Donor	A:LEU99:O	H-Acceptor	122.607	130.538
A:LEU99:HN - :UNL1:O	2.14696	Hydrogen Bond	Conventional Hydrogen Bond	A:LEU99:HN	H-Donor	:UNL1:O	H-Acceptor			165.543	91.061
A:TRP104:HE1 - :UNL1:O	2.73578	Hydrogen Bond	Conventional Hydrogen Bond	A:TRP104:HE1	H-Donor	:UNL1:O	H-Acceptor			103.235	102.54
A:TRP104:HE1 - :UNL1:O	2.92475	Hydrogen Bond	Conventional Hydrogen Bond	A:TRP104:HE1	H-Donor	:UNL1:O	H-Acceptor			126.897	91.181
A:ARG139:HH11 - :UNL1:O	2.6283	Hydrogen Bond	Conventional Hydrogen Bond	A:ARG139:HH11	H-Donor	:UNL1:O	H-Acceptor			109.367	134.762
A:ARG139 - :UNL1	5.09122	Hydrophobic	Alkyl	A:ARG139	Alkyl	:UNL1	Alkyl
A:TYR36 - :UNL1	5.31486	Hydrophobic	Pi-Alkyl	A:TYR36	Pi-Orbitals	:UNL1	Alkyl
A:TRP104 - :UNL1	4.87908	Hydrophobic	Pi-Alkyl	A:TRP104	Pi-Orbitals	:UNL1	Alkyl
C8-AHL precursor
:UNL1:O - A:LEU99:O	2.6998	Hydrogen Bond	Conventional Hydrogen Bond	:UNL1:O	H-Donor	A:LEU99:O	H-Acceptor	133.158	134.344
A:TRP104:HE1 - :UNL1:O	2.83469	Hydrogen Bond	Conventional Hydrogen Bond	A:TRP104:HE1	H-Donor	:UNL1:O	H-Acceptor			103.431	93.276
A:TRP104:HE1 - :UNL1:O	2.68912	Hydrogen Bond	Conventional Hydrogen Bond	A:TRP104:HE1	H-Donor	:UNL1:O	H-Acceptor			126.995	102.07
A:ARG139:HH11 - :UNL1:O	2.66862	Hydrogen Bond	Conventional Hydrogen Bond	A:ARG139:HH11	H-Donor	:UNL1:O	H-Acceptor			106.895	140.743
A:TRP97 - :UNL1	5.09319	Hydrophobic	Pi-Alkyl	A:TRP97	Pi-Orbitals	:UNL1	Alkyl
C10-AHL precursor
:UNL1:O - A:LEU99:O	2.70109	Hydrogen Bond	Conventional Hydrogen Bond	:UNL1:O	H-Donor	A:LEU99:O	H-Acceptor	129.976	133.69
A:LEU99:HN - :UNL1:O	2.13178	Hydrogen Bond	Conventional Hydrogen Bond	A:LEU99:HN	H-Donor	:UNL1:O	H-Acceptor			165.408	90.431
A:TRP104:HE1 - :UNL1:O	2.755	Hydrogen Bond	Conventional Hydrogen Bond	A:TRP104:HE1	H-Donor	:UNL1:O	H-Acceptor			103.443	94.224
A:TRP104:HE1 - :UNL1:O	2.66964	Hydrogen Bond	Conventional Hydrogen Bond	A:TRP104:HE1	H-Donor	:UNL1:O	H-Acceptor			126.589	99.365
A:ARG139:HH11 - :UNL1:O	2.63032	Hydrogen Bond	Conventional Hydrogen Bond	A:ARG139:HH11	H-Donor	:UNL1:O	H-Acceptor			109.802	134.778
C12-AHL precursor
:UNL1:O - A:LEU99:O	2.70115	Hydrogen Bond	Conventional Hydrogen Bond	:UNL1:O	H-Donor	A:LEU99:O	H-Acceptor	132.604	136.141
A:LEU99:HN - :UNL1:O	2.16949	Hydrogen Bond	Conventional Hydrogen Bond	A:LEU99:HN	H-Donor	:UNL1:O	H-Acceptor			169.476	92.791
A:TRP104:HE1 - :UNL1:O	2.85783	Hydrogen Bond	Conventional Hydrogen Bond	A:TRP104:HE1	H-Donor	:UNL1:O	H-Acceptor			104.428	91.737
A:TRP104:HE1 - :UNL1:O	2.6467	Hydrogen Bond	Conventional Hydrogen Bond	A:TRP104:HE1	H-Donor	:UNL1:O	H-Acceptor			125.806	104.649
A:ARG139:HH11 - :UNL1:O	2.71302	Hydrogen Bond	Conventional Hydrogen Bond	A:ARG139:HH11	H-Donor	:UNL1:O	H-Acceptor			107.272	137.367
A:TRP97 - :UNL1	4.21791	Hydrophobic	Pi-Alkyl	A:TRP97	Pi-Orbitals	:UNL1	Alkyl
A:TRP97 - :UNL1:C	3.83625	Hydrophobic	Pi-Alkyl	A:TRP97	Pi-Orbitals	:UNL1:C	Alkyl
A:TRP97 - :UNL1	5.2795	Hydrophobic	Pi-Alkyl	A:TRP97	Pi-Orbitals	:UNL1	Alkyl
A:TRP97 - :UNL1:C	4.18945	Hydrophobic	Pi-Alkyl	A:TRP97	Pi-Orbitals	:UNL1:C	Alkyl
