# Supplementary material
Source: MDPI journal article supplement (https://www.mdpi.com/2073-4344/13/2/364)
Supplement: s1 [file s1 › Table S5.xlsx]

## Sheet: Sheet1
Quorum sensing molecule	Abbreviated name	PubChem CID	Fatty acid group	Precursor molecule name	Precursor molecule CID	Side chain substitution	Microorganism	References
3-oxo-hexanoyl-Homoserine Lactone	3-oxo-C6-HSL	688505	Caproic acid	3-Oxohexanoic acid	439658	3-oxo	V. fischeri	10.1002/pro.2132
3-oxo-dodecanoyl-Homoserine Lactone	3-oxo-C12-HSL	3246941	Lauric acid	3-Oxododecanoic acid	439717	3-oxo	P. aeruginosa	10.1016/j.micinf.2009.12.009
N-butyryl-homoserine lactone	C4-HSL	443433	Butanoic acid	Butyric acid	264	N.A.	P. aeruginosa	10.1073/pnas.97.16.8789
(3-hydroxy-7-cis-tetradecenoyl)homoserine lactone	3-hydroxy-7-cis- C14-HSL	5281979	Myristoleic acid	(Z)-3-Hydroxy-7-tetradecenoic acid	44610299	3-hydroxy	Rhizobium leguminosarum	10.1099/00221287-146-10-2469
N-(4-coumaroyl)-L-homoserine lactone	p-coumaroyl-HSL	71311837	p-coumaric acid	p-coumaric acid	637542	NA	Rhodopseudomonas palustris	https://doi.org/10.1038/nature07088
3-Hydroxy-butanoyl-L-homoserine lactone	3OH‑C4‑HSL	318165234	Butanoic acid	3-hydroxybutanoic acid	441	3-hydroxy	V. harveyi	https://doi.org/10.1038/nrmicro.2016.89
N-octanoyl homoserine lactone	C8-HSL	3474204	Caprylic acid	octanoic acid	379	NA	Marine sediment	https://doi.org/10.1002/lom3.10412
N-decanoyl homoserine lactone	C10-HSL	11644562	Capric acid	Decanoic acid	2969	NA	Marine sediment	https://doi.org/10.1002/lom3.10413
N-3-hydroxydodecanoyl homoserine lactone	3-hydroxy-C12-HSL	11507677	Lauric acid	3-Hydroxydodecanoic acid	94216	3-hydroxy	Marine sediment	https://doi.org/10.1002/lom3.10414
N-3-hydroxytetradecanoyl homoserine lactone	3-hydroxy-C14-HSL	138753051	Myristoleic acid	3-Hydroxytetradecanoic acid	16064	3-hydroxy	Marine sediment	https://doi.org/10.1002/lom3.10415
N-3-hydroxydecanoyl homoserine lactone	3-hydroxy-C10-HSL	71353010	Capric acid	3-Hydroxydecanoic acid	26612	3-hydroxy	Marine sediment	https://doi.org/10.1002/lom3.10416
N-3-oxodecanoyl homoserine lactone	3-oxo-C10-HSL	11680589	Capric acid	3-oxodecanoic acid	5282982	3-oxo	Marine sediment	https://doi.org/10.1002/lom3.10417
Isovaleryl-homoserine lactone	C5-HSL	71627311	Valeric acid	Isovaleric acid	10430	NA	Bradyrhizobium japonicum USDA110	https://doi.org/10.1073/pnas.1114125108
N-Dodecanoyl-DL-homoserine lactone	C12-HSL	11565426	Lauric acid	Dodecanoic acid	3893	NA	P. aeruginosa	https://doi.org/10.1038/nrmicro.2016.89
N-Myristoyl-DL-homoserine lactone	C14-HSL	122174064	Myristoleic acid	Myristoleic acid	5281119	NA	P. aeruginosa	https://doi.org/10.1038/nrmicro.2016.90
N-(3-Oxooctanoyl)-DL-homoserine lactone	3-oxo-C8-HSL	4476497	Caprylic acid	3-Oxooctanoic acid	128859	3-oxo	Exiguobacterium MPO	https://doi.org/10.1111/1574-6968.12123
N-hexanoyl homoserine lactone	C6-HSL	10058590	Caproic acid	Hexanoic acid	8892	NA	P. aeruginosa	https://doi.org/10.1080/09593330.2020.1811389
N-(3-oxo-butanoyl)-L-homoserine lactone	3-oxo-C4-HSL	10419888	Butanoic acid	3-oxobutanoic acid	96	3-oxo	Anaerobic bioreactor	10.3390/membranes10110320
